# Supplementary material
Source: Springer Nature journal article supplement (https://www.springermedizin.de/resource/supplementary/13075_2010_2902_MOESM14_ESM.pdf/9693146)

**Figure 7**  
**CXCL10**

(C)

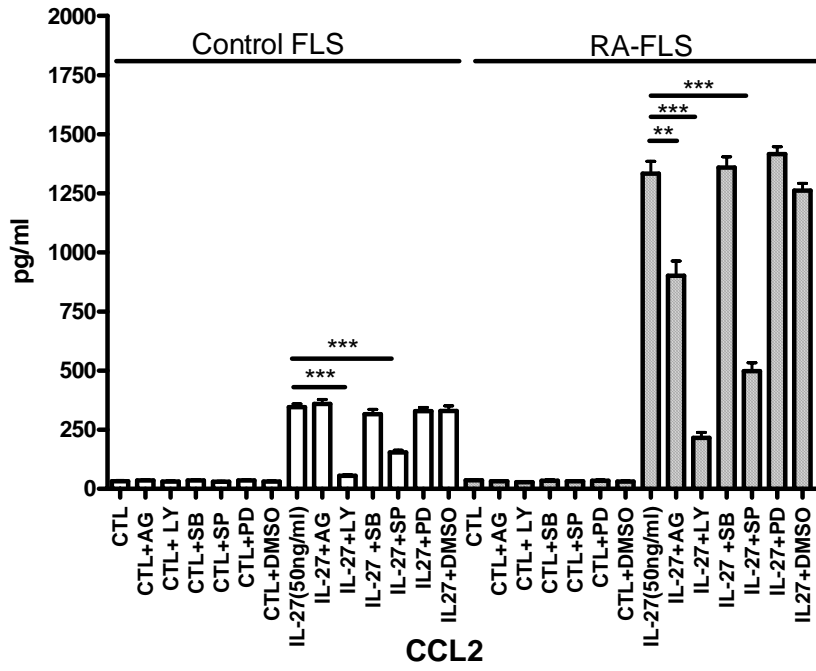

(D)

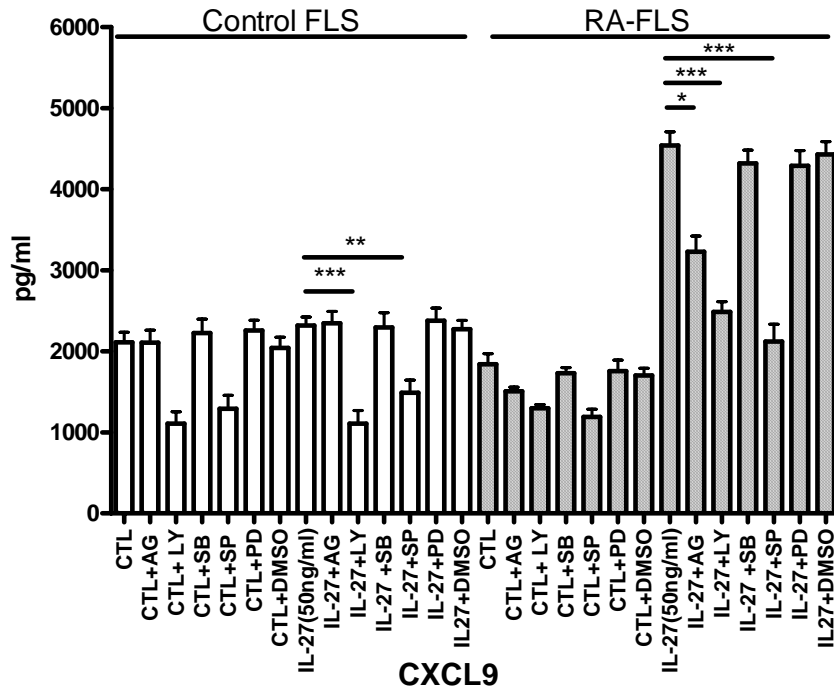

(E)

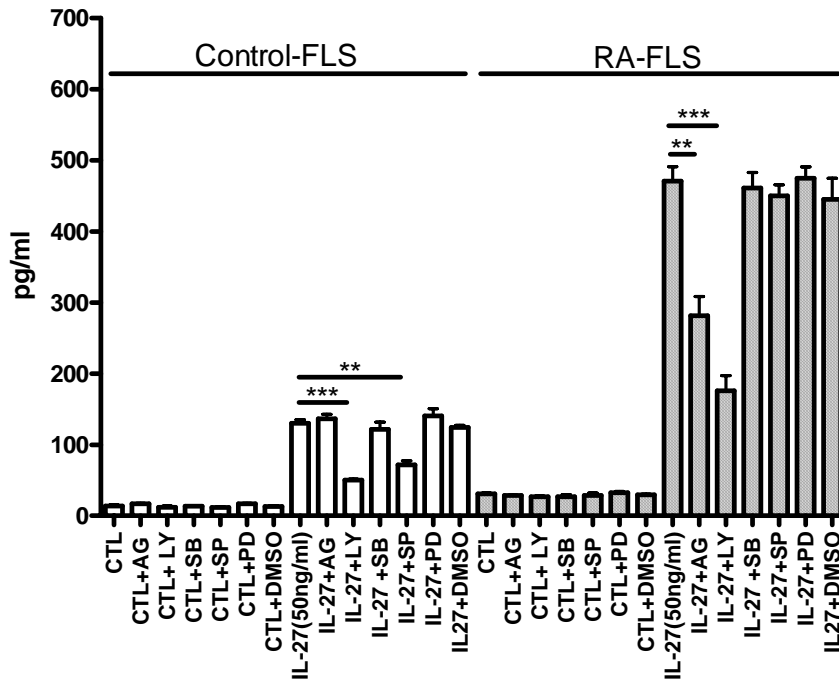

Supplement: MOESM14 [file 9693146]
